# Supplementary material for: Mortality After Incident Cancer in People With and Without Type 2 Diabetes
Source: Oxford University Press journal article supplement (doi:10.2337/dc11-1313), 2012-01-16

SUPPLEMENTARY DATA

**Supplementary Figure 1.** Survival plots for type 2 diabetes vs. no diabetes following adjustment for various baseline parameters using a Cox model

Black, no diabetes; gray, type 2 diabetes.  
A: Unadjusted

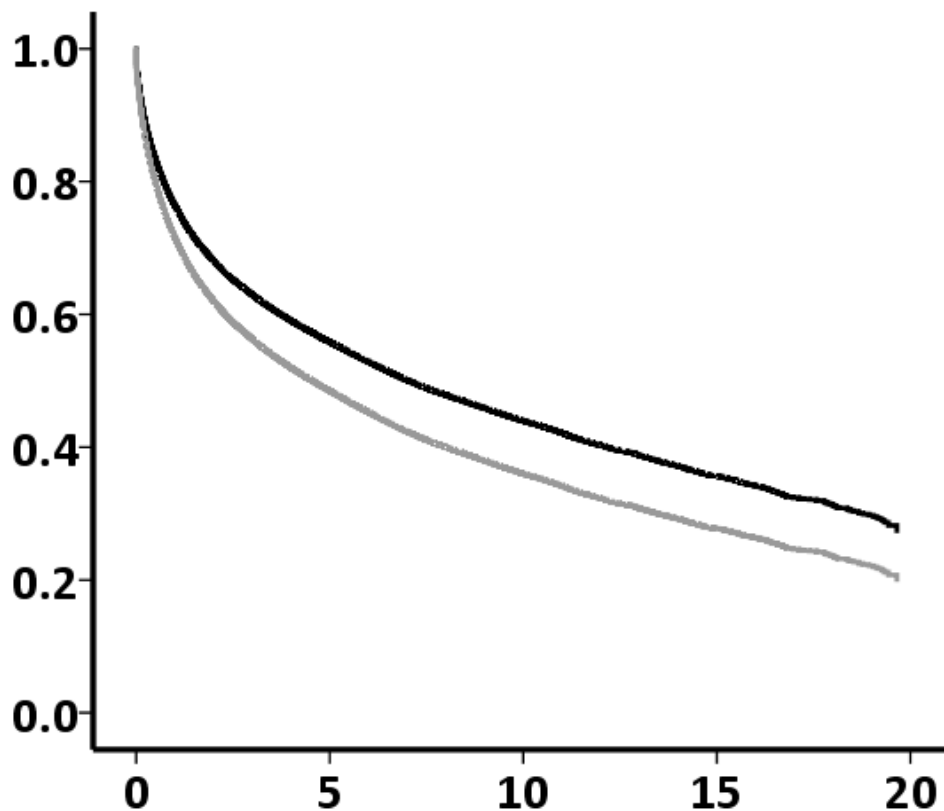

SUPPLEMENTARY DATA

Black, no diabetes; gray, type 2 diabetes.  
*B*: Adjusted: age

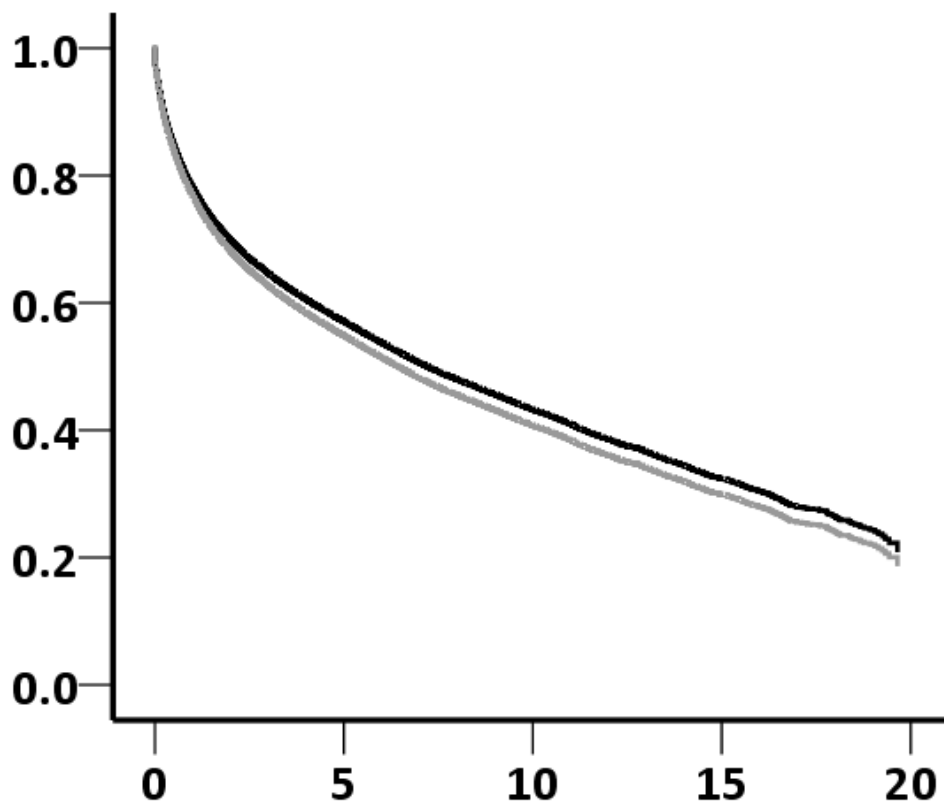

SUPPLEMENTARY DATA

Black, no diabetes; gray, type 2 diabetes.  
C: Adjusted: age and sex

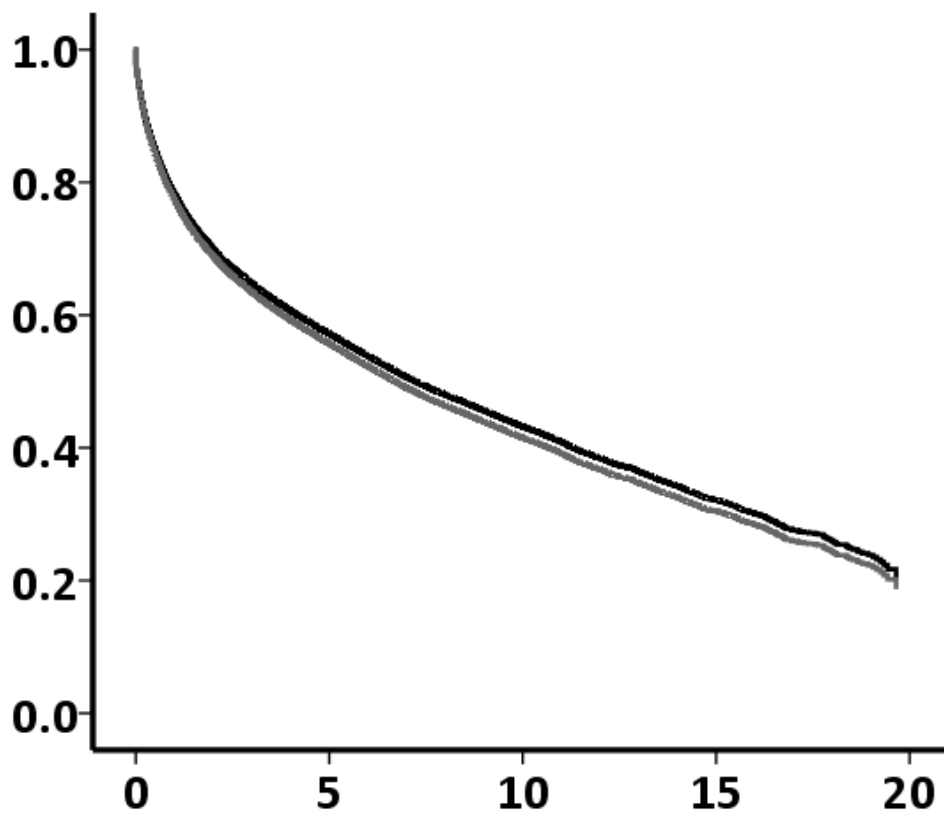

SUPPLEMENTARY DATA

Black, no diabetes; gray, type 2 diabetes.  
*D*: Adjusted: age, sex and smoking history

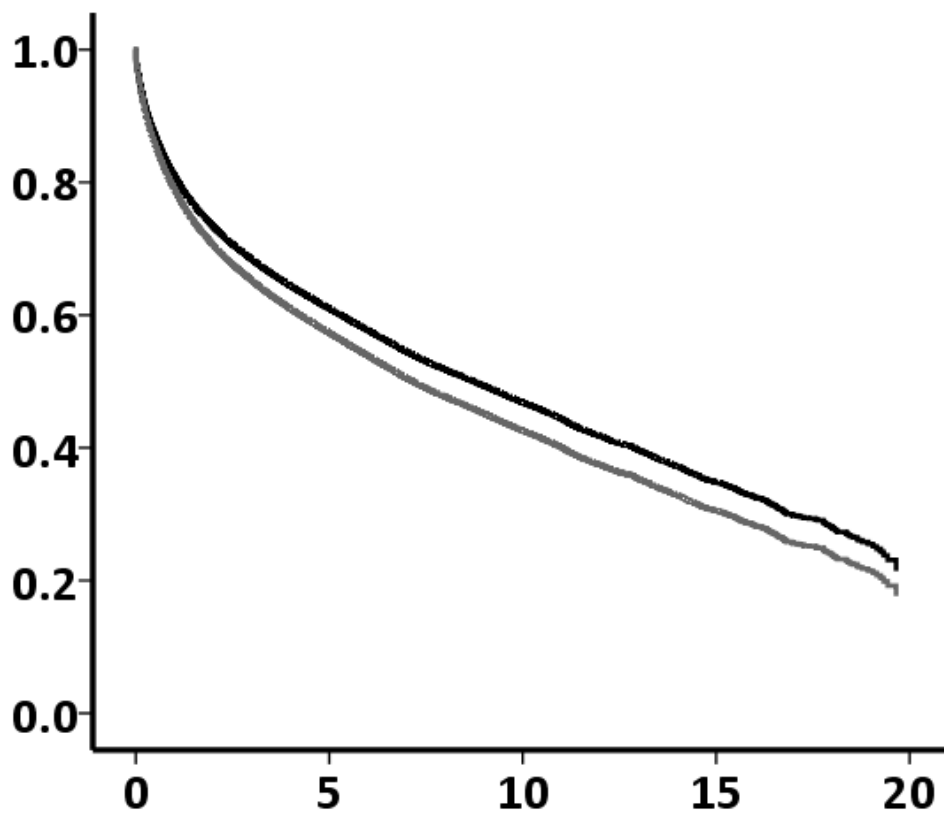

## SUPPLEMENTARY DATA

Black, no diabetes; gray, type 2 diabetes.

*E*: Adjusted: age, sex, smoking history, and Charlson comorbidity index.

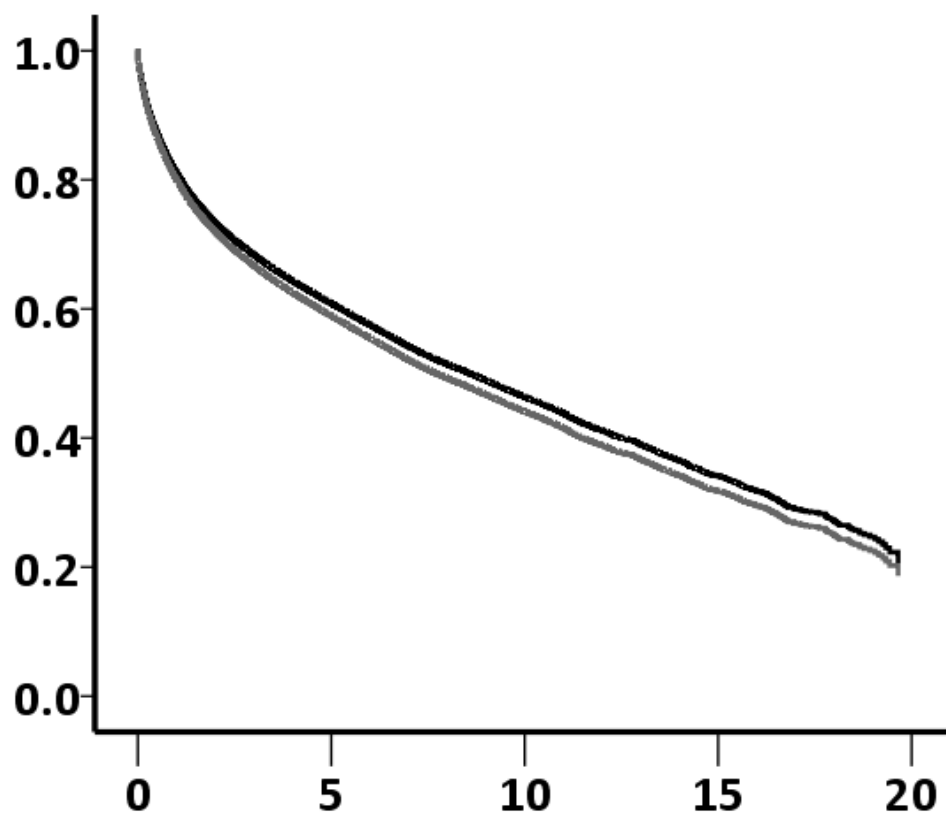

## SUPPLEMENTARY DATA

Black, no diabetes; gray, type 2 diabetes.

*F*: Adjusted: age, sex, smoking history, Charlson comorbidity index, and year of diagnosis.

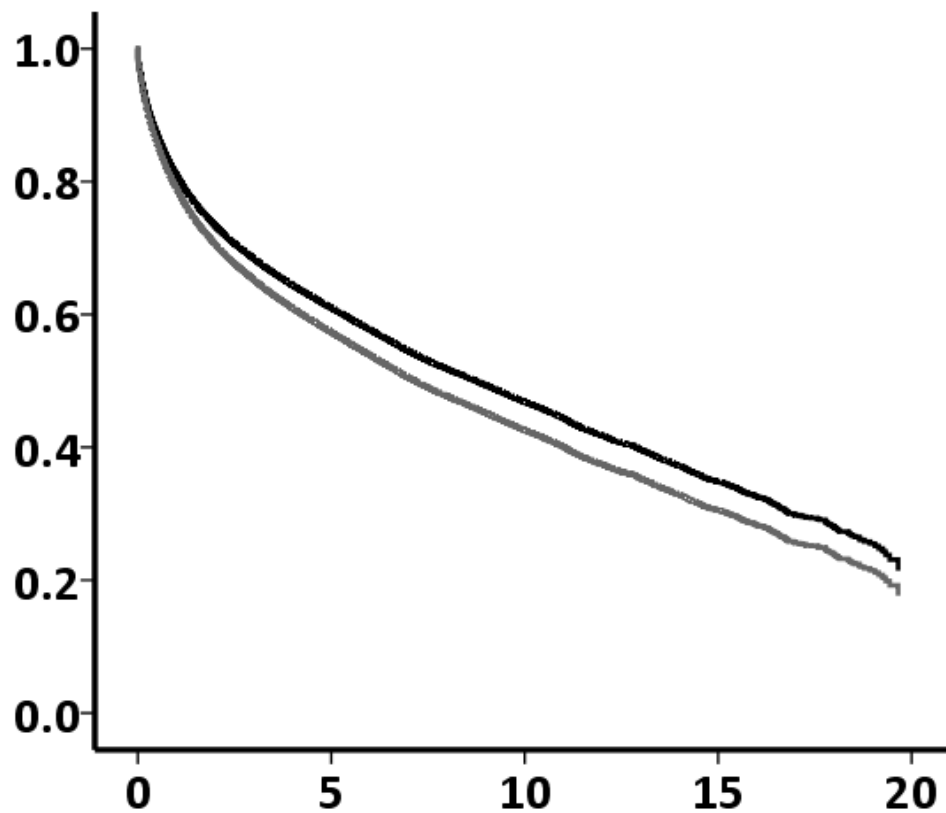

Supplement: dc111313supplementarydata.pdf [file dc111313supplementarydata.pdf]
